# Supplementary material for: multiScaleR: A generalizable approach for multiscale ecological modeling and scale of effect estimation
Source: Research Square preprint supplement (doi:10.21203/rs.3.rs-7246115/v1), 2025-08-18
Supplement: Supplementary file 1 [file e4dac066b69743903d1d01c7.docx]

**Supplement**


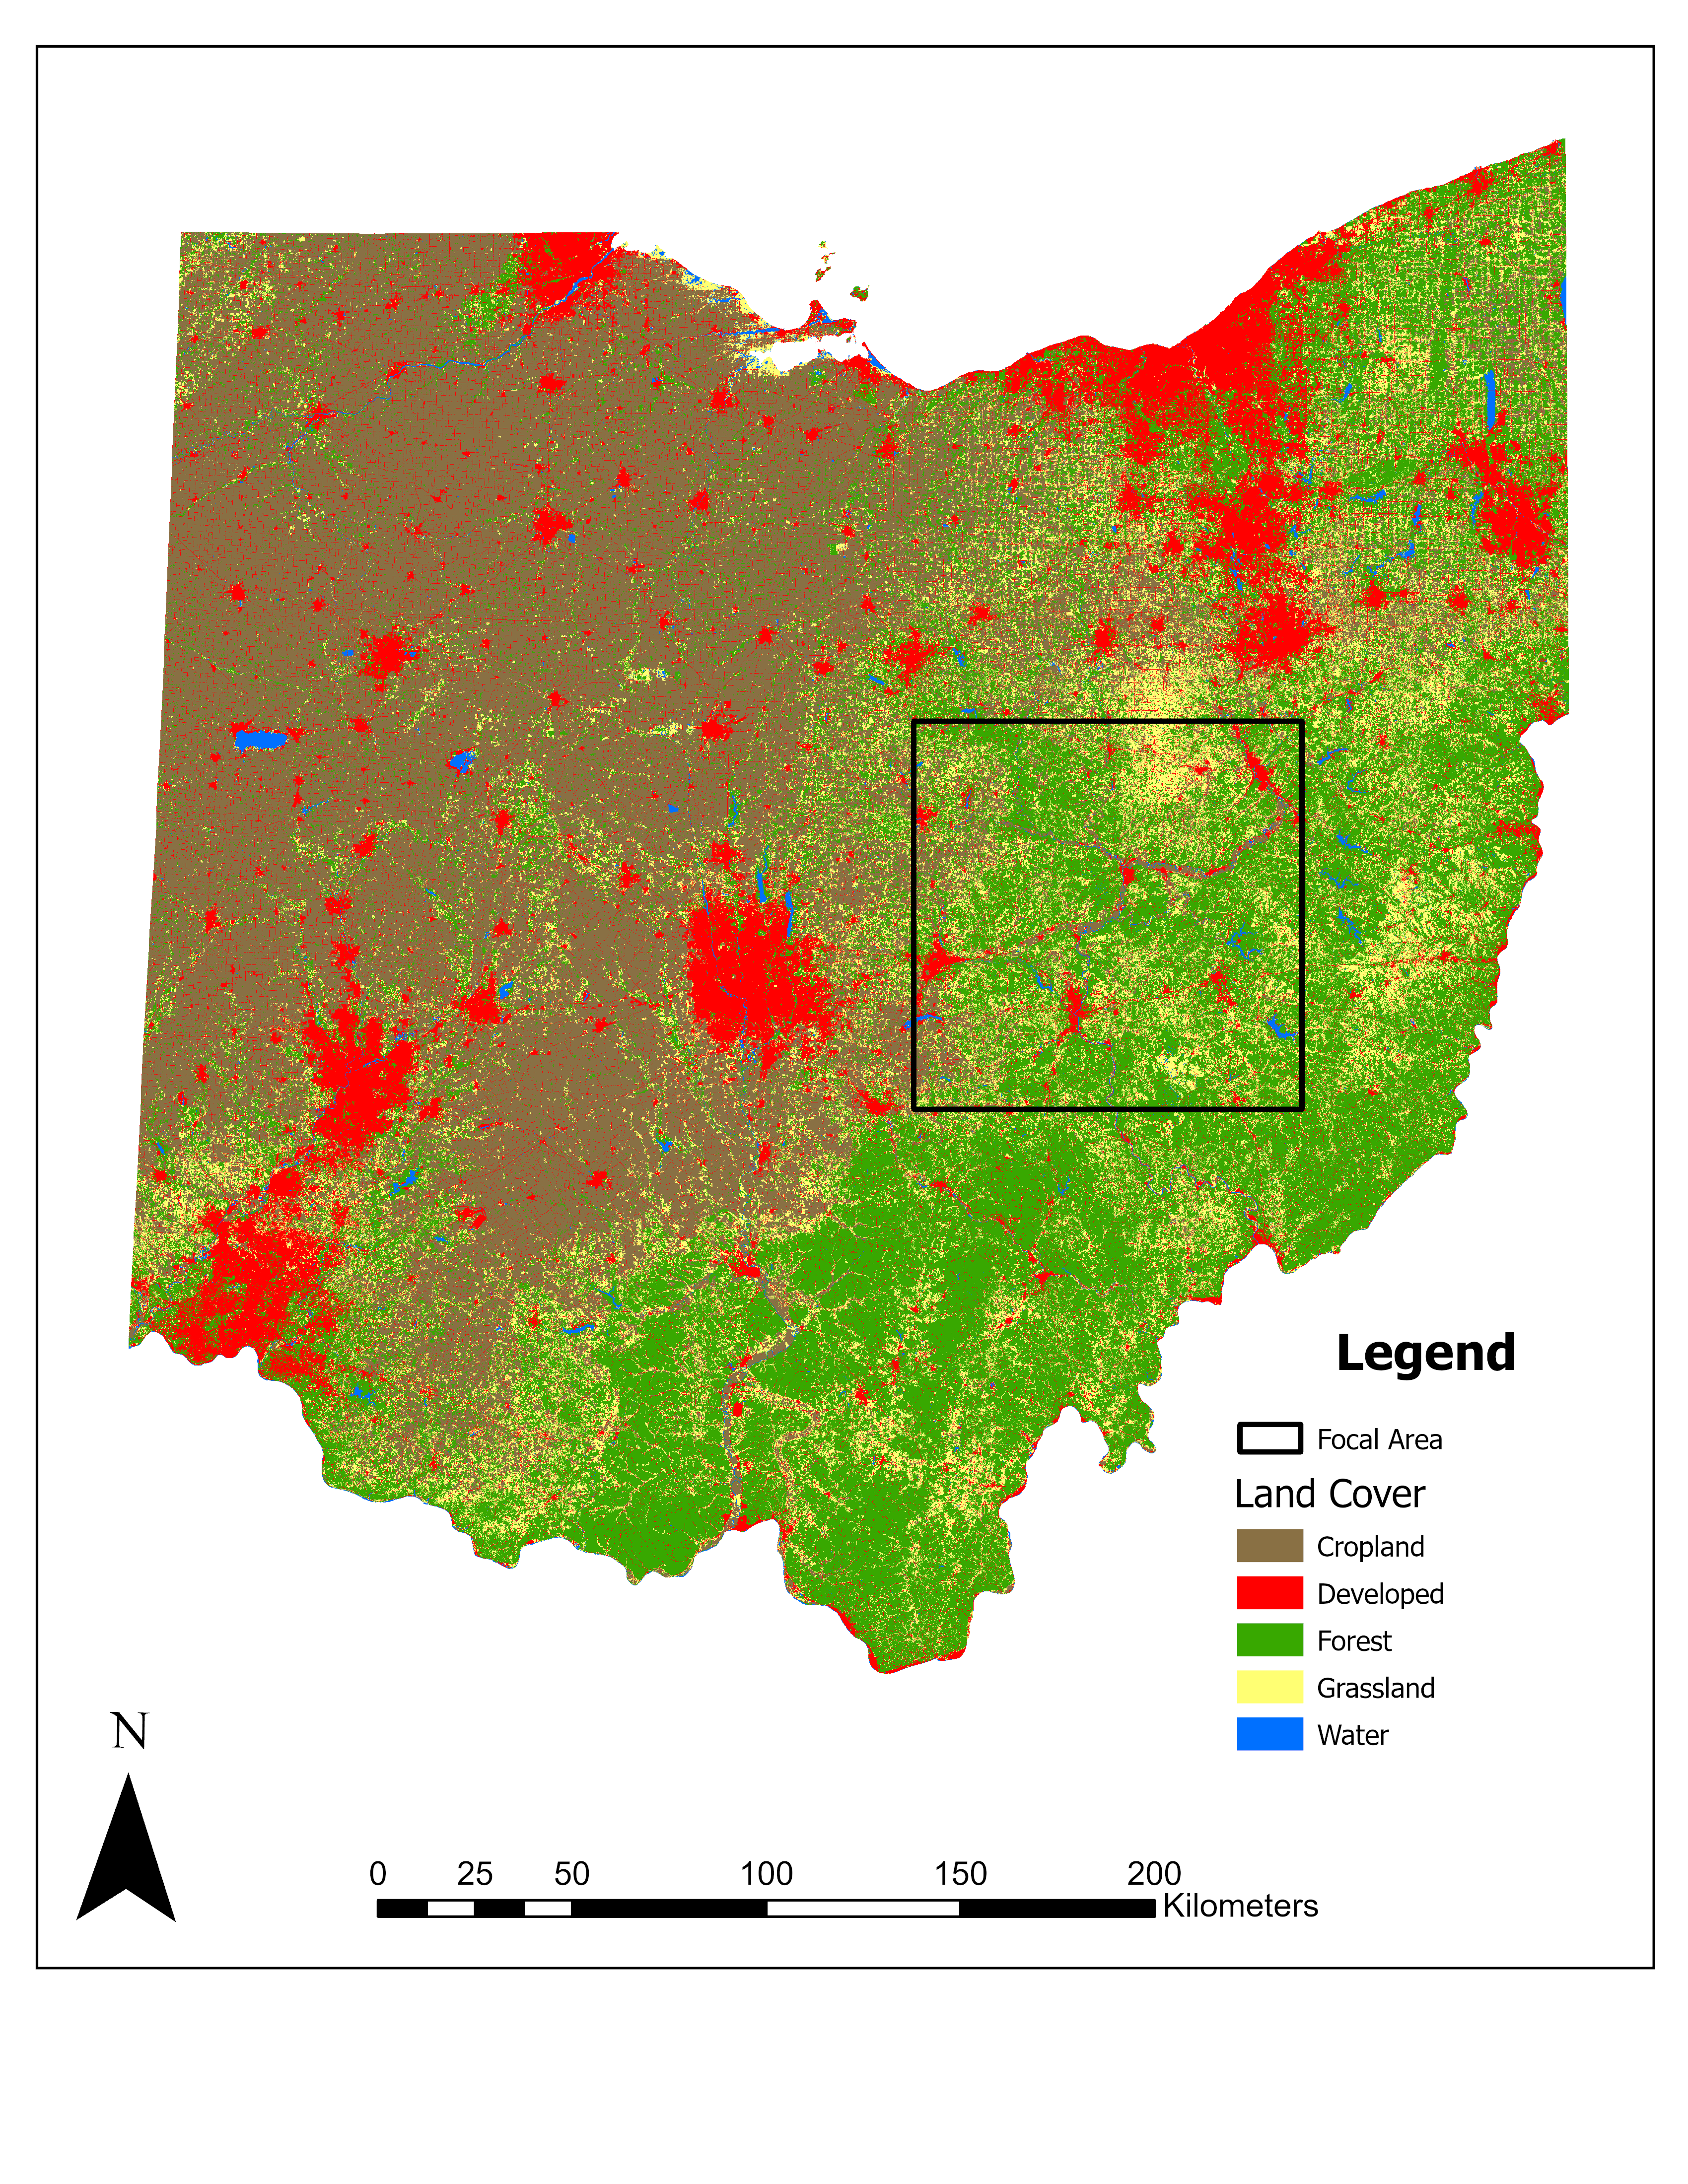


**Figure S1.** Map of Ohio, United States of America, showing simplified land cover and the focal 10,000km2 area used to simulate data for the empirical analysis.
